# Supplementary material for: Genetic structure, divergence and admixture of Han Chinese, Japanese and Korean populations
Source: Springer Nature journal article supplement (doi:10.1186/s41065-018-0057-5), 2018-04-06
Supplement: 41065_2018_57_MOESM6_ESM.pdf [file 41065_2018_57_MOESM6_ESM.pdf]

**K=3**

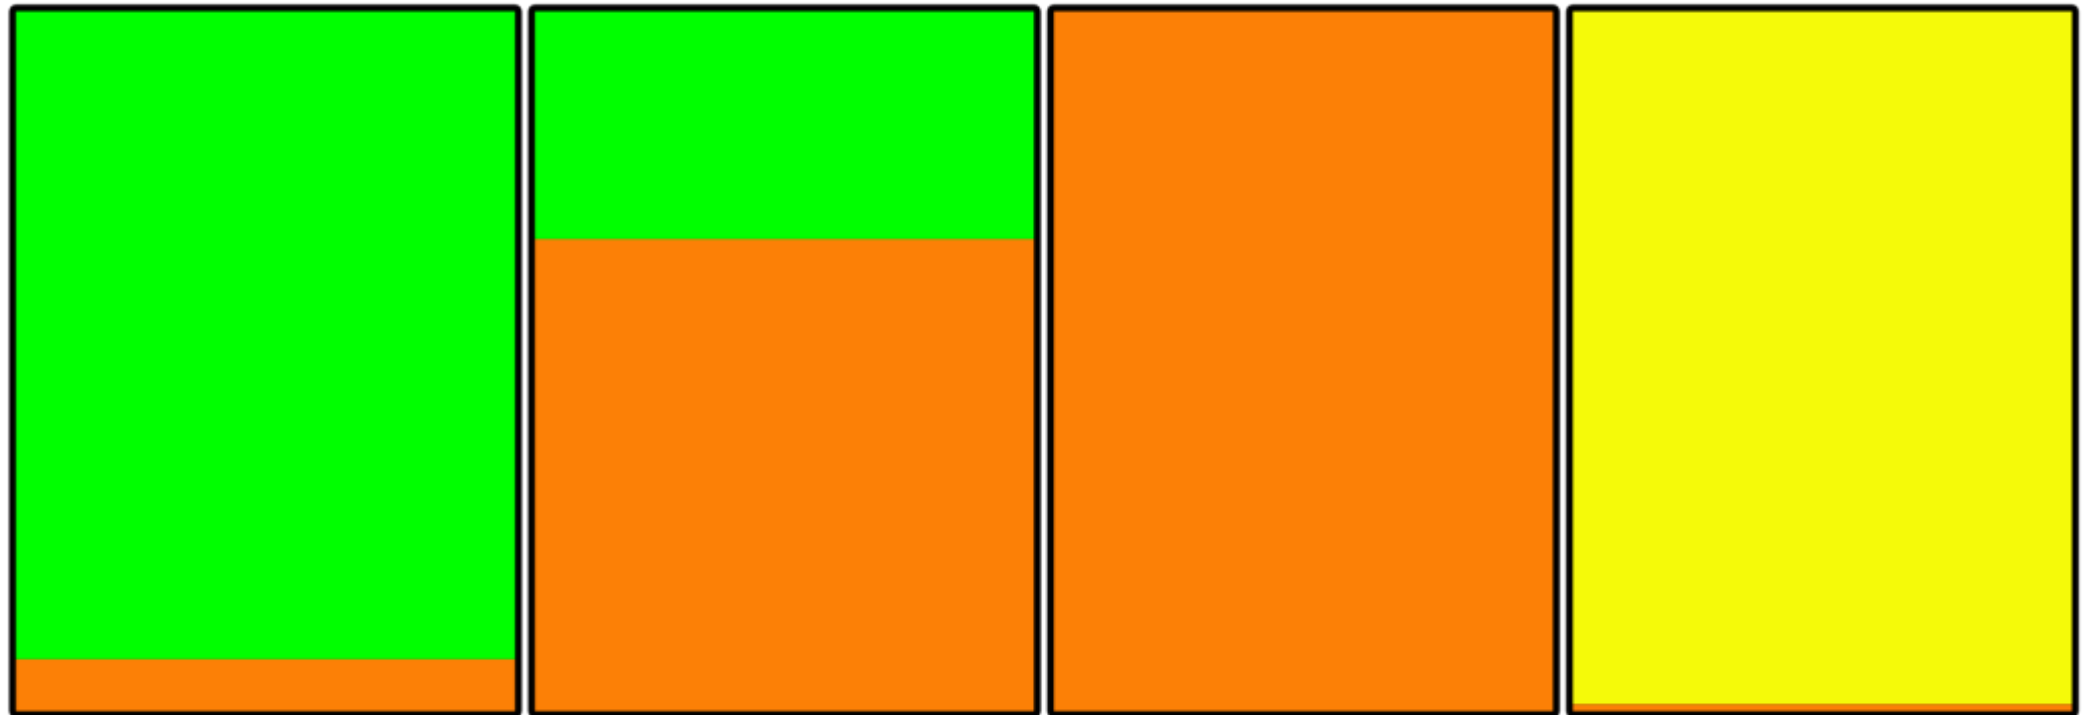

**K=4**

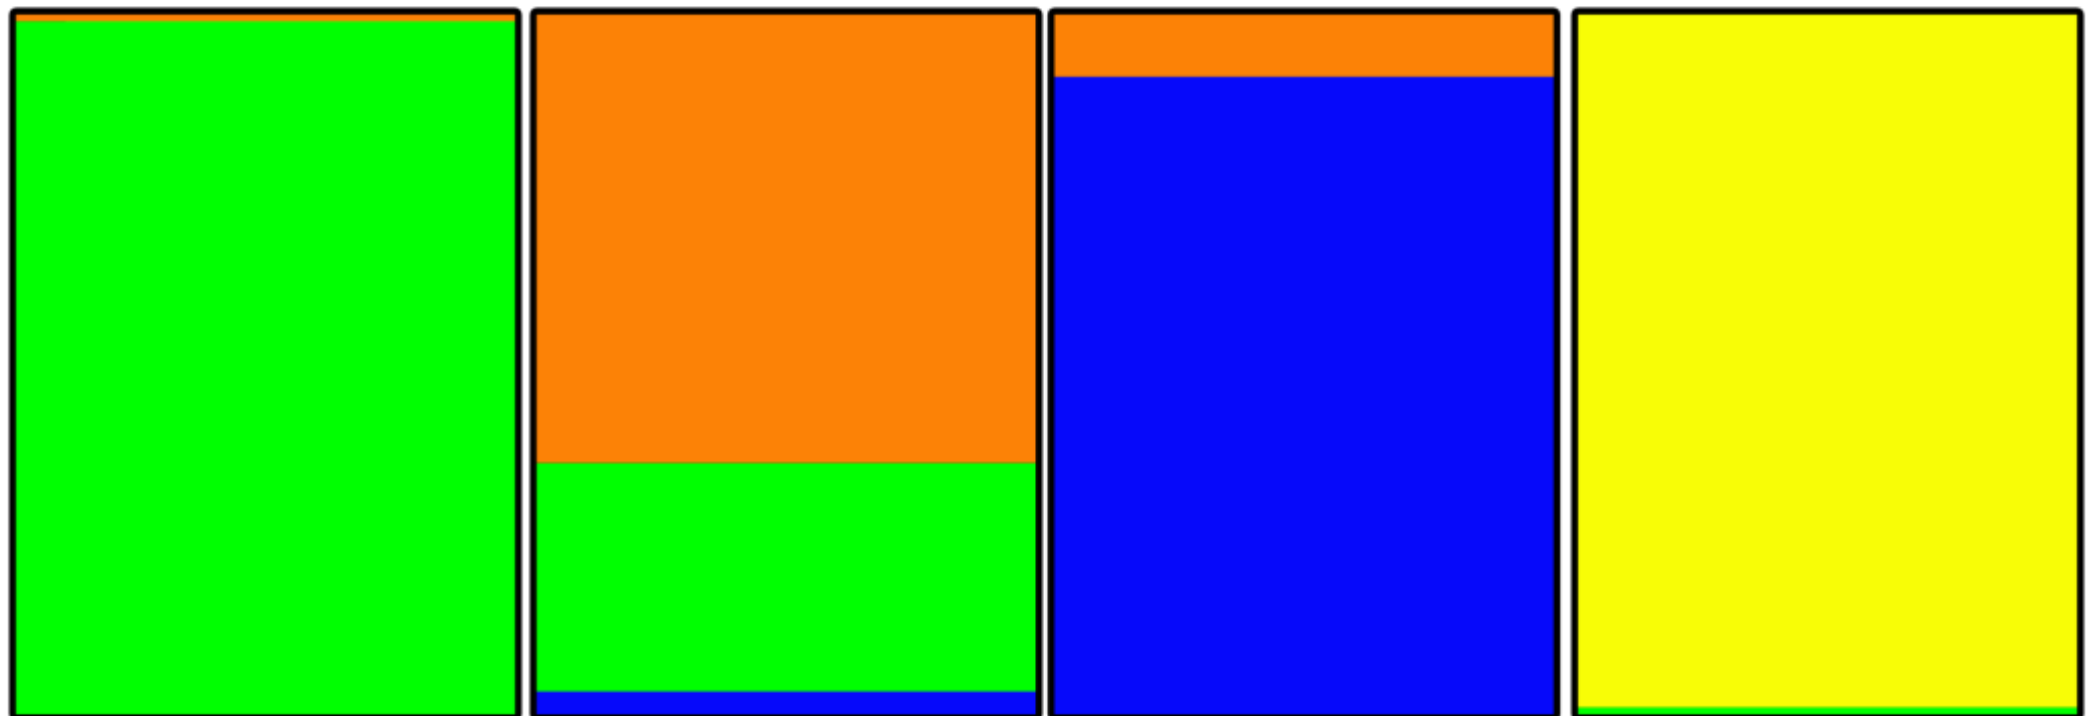

**CHS**

**CHB**

**KOR**

**JPT**
