# Supplementary material for: Genetic structure, divergence and admixture of Han Chinese, Japanese and Korean populations
Source: Springer Nature journal article supplement (doi:10.1186/s41065-018-0057-5), 2018-04-06

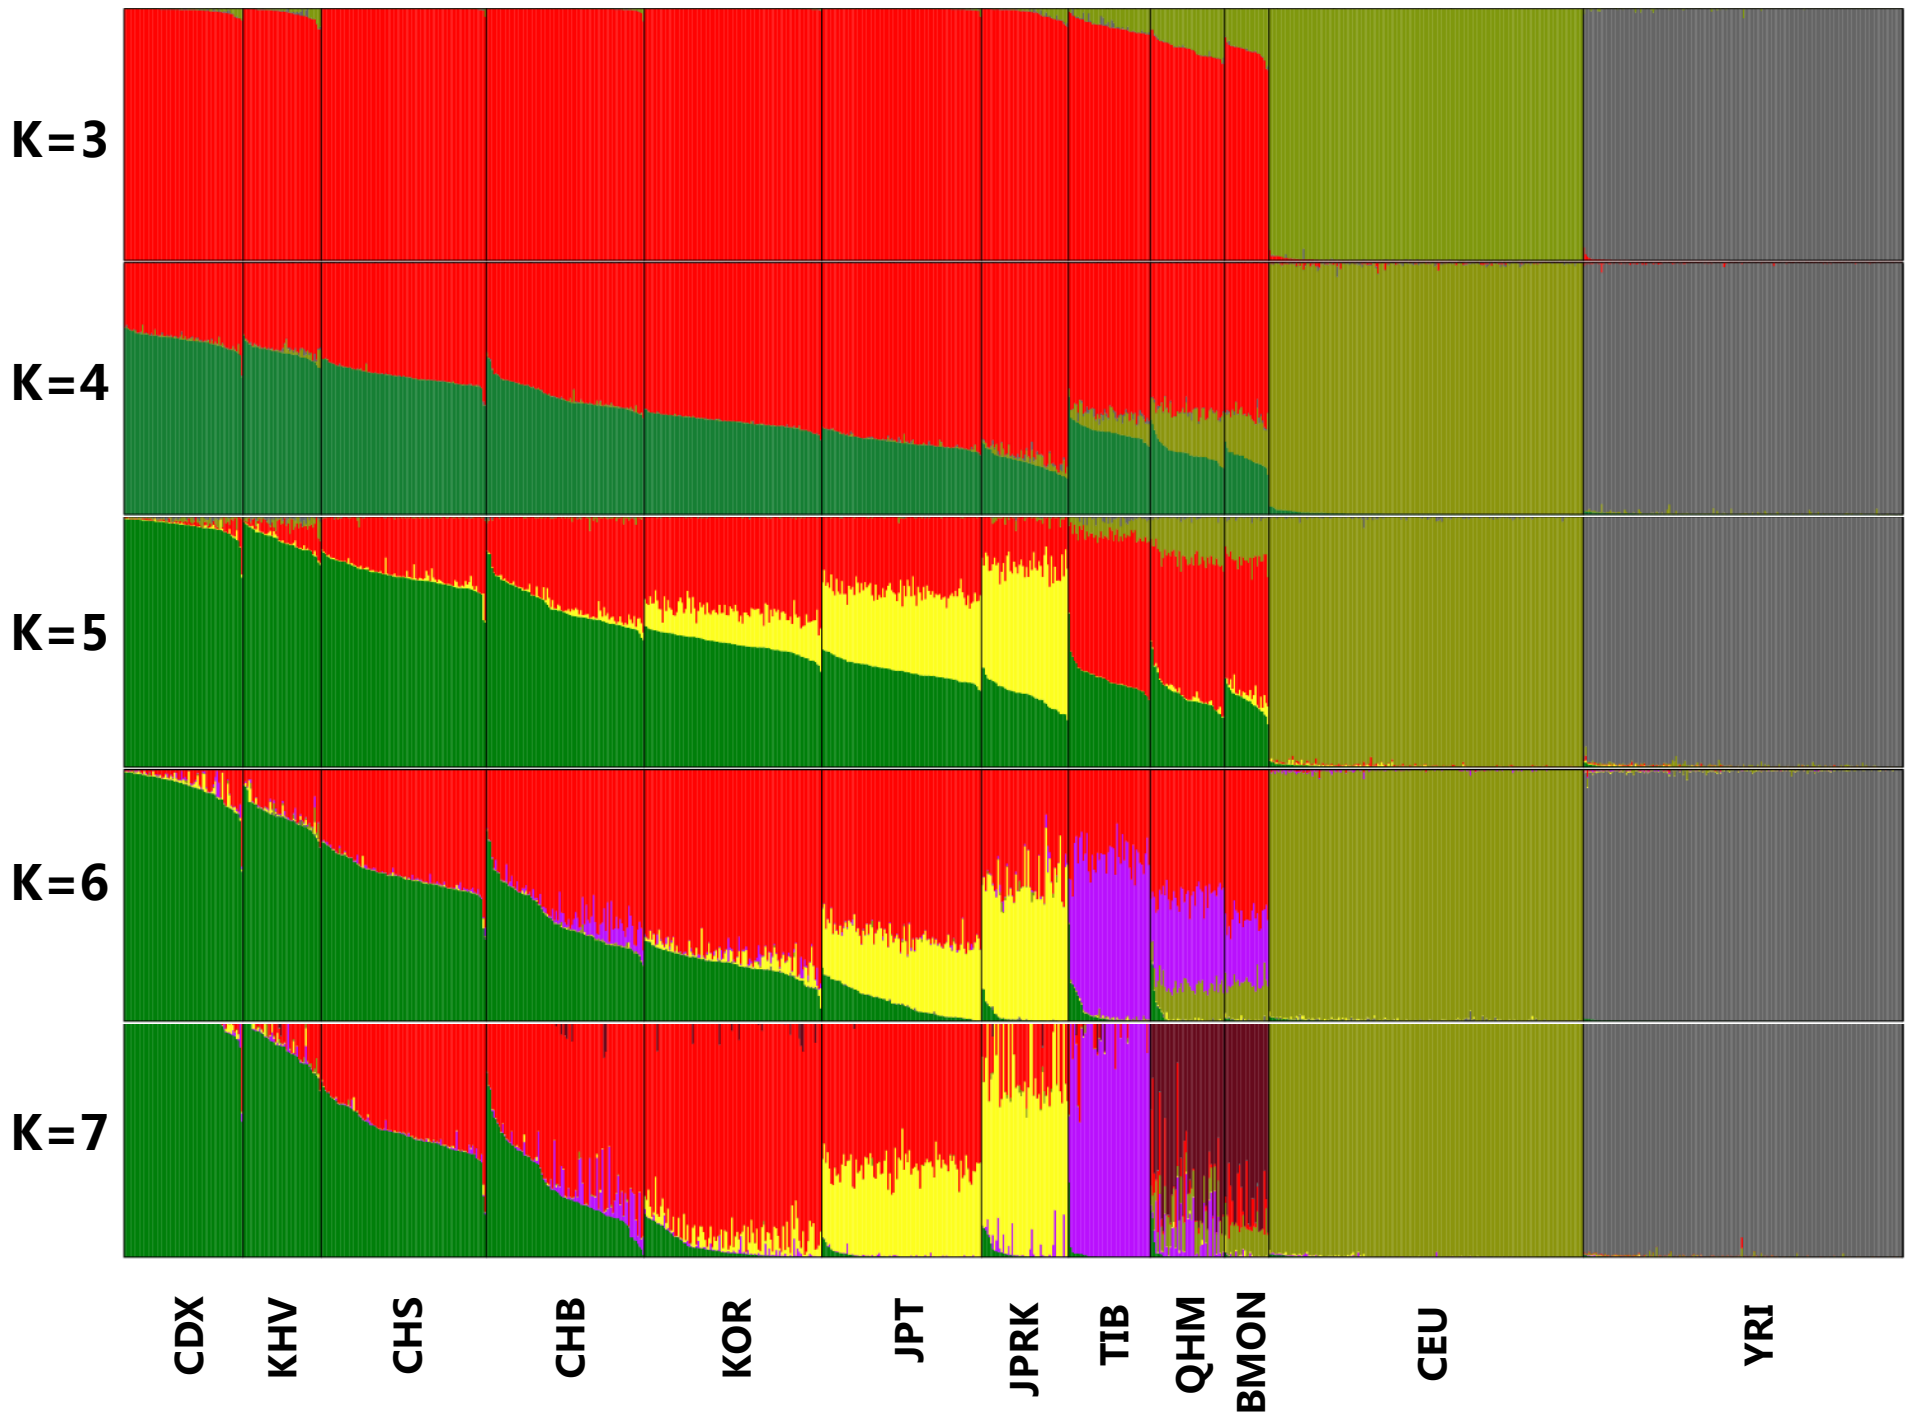

Supplement: 41065_2018_57_MOESM9_ESM.pdf [file 41065_2018_57_MOESM9_ESM.pdf]
